# Supplementary material for: Are fancy acidic or neutral ligands really needed for synergism in ionic liquids? A comparative study of lanthanoid extraction in CHCl3 and an ionic liquid
Source: Royal Society of Chemistry journal article supplement (doi:10.1039/c5nj00777a), 2015-01-01
Supplement: c5nj00777a1.pdf [file c5nj00777a1.pdf]

## New Journal of Chemistry

### ELECTRONIC SUPPLEMENTARY INFORMATION

#### Are fancy acidic or neutral ligands really needed for synergism in ionic liquids? A comparative study of lanthanoids extraction in CHCl<sub>3</sub> and an ionic liquid.

Maria Atanassova,<sup>a, c, d\*</sup> Vanya Kurteva,<sup>b</sup> Lubomir Lubenov<sup>b</sup>, Sabi Varbanov<sup>b</sup>, Isabelle Billard<sup>c, d</sup>

<sup>a</sup>University of Chemical Technology and Metallurgy, Department of General and Inorganic Chemistry, 8 Kliment Okhridski blvd., 1756 Sofia, Bulgaria

E-mail: ma@uctm.edu

<sup>b</sup>Institute of Organic Chemistry with Centre of Phytochemistry, Bulgarian Academy of Sciences, Block 9, Acad. G. Bonchev street, BG 1113, Sofia, Bulgaria

<sup>c</sup>University of Grenoble Alpes, F-38000 Grenoble, France

<sup>d</sup>CNRS, LEPMI, UMR 5279, F-38000 Grenoble, France

#### 1. Synthesis and characterization of HL.

The pyrazolone derivative, 3-methyl-1-phenyl-4-(4-phenylbenzoyl)-pyrazol-5-one (**HL**) [1], was obtained according to an adapted literature procedure [2] in excellent yield. Shortly, 3-methyl-1-phenyl-1H-pyrazol-5-one (8.7 g, 50 mmol) was dissolved in dry dioxane (60 ml) under gentle heating. Ca(OH)<sub>2</sub> (7.4 g, 100 mmol) was added and the mixture was stirred at room temperature for 0.5 h. 4-Phenylbenzoyl chloride (6.5 ml, 50 mmol) was then added and the mixture was refluxed with stirring for 2 h. The reaction mixture was cooled to room temperature and poured into 10 % aq. HCl (250 ml). The solid phase formed was filtered off, washed with water, dried on air, and recrystallized from ethanol/acetone to give pure product in 86-94 % yield. Second recrystallization from ethanol afforded the analytically pure compound: 71-76 % yield; m. p. 151.1-151.5°C; R<sub>f</sub> 0.51 (MeOH:CH<sub>2</sub>Cl<sub>2</sub> 5:95). The NMR spectra were initially recorded in chloroform-d<sub>3</sub> as 0.01 M solutions. However, the proton spectrum of the ligand showed overlapped signal for 5 aromatic protons. Also, four protons appeared as a sharp singlet due to non-first order spectrum. This pattern made the assignment of the signals impossible. So, the spectra were recorded in benzene-d<sub>6</sub>, where the most part of the protons give separate and well defined signals. The full assignment was accomplished by analysing the interactions in 2D experiments. For simplicity, the nuclei of C<sub>6</sub>H<sub>4</sub> unit of biphenyl are assigned as ‘ and those of Ph part as ‘; Ph means N-Ph. <sup>1</sup>H NMR (CDCl<sub>3</sub>, DRX 250) 2.223 (s, 3H, CH<sub>3</sub>), 7.343 (ddt, 1H, J 1.2, 6.8, 8.1, Ar CH), 7.444-7.561 (m, 5H Ar CH), 7.699 (dd, 2H, J 1.6, 6.8, Ar CH), 7.778 (s, 4H, Ar CH, non-first order spectrum), 7.935 (dd, 2H, J 1.2, 8.7, Ar CH), 10.595 (bs, 1H, OH); <sup>13</sup>C NMR (CDCl<sub>3</sub>, DRX 250) 16.05 (CH<sub>3</sub>), 103.67 (C<sub>q</sub>), 120.78 (2 x CH), 126.68 (CH), 127.07 (2 x CH), 127.26 (2 x CH), 128.22 (CH), 128.67 (2 x CH), 129.01 (2 x CH), 129.14 (2 x CH), 136.24 (C<sub>q</sub>), 137.32 (C<sub>q</sub>), 139.89 (C<sub>q</sub>), 144.86 (C<sub>q</sub>), 147.87 (C<sub>q</sub>), 161.69 (C<sub>q</sub>), 191.41 (C=O); <sup>1</sup>H NMR (benzene-d<sub>6</sub>, II+ 600) 1.977 (s, 3H, CH<sub>3</sub>), 6.972 (tt, 1H, J 1.0, 7.4, CH-4 of Ph), 7.138-7.221 (m, 5H, CH-3 and CH-5 of Ph and CH-3’’, CH-4’’ and CH-5’’ of biPh), 7.339 (dd, 2H, J 1.7, 8.3, CH-3’ and CH-5’ of biPh), 7.381 (dd, 2H, J 1.4, 8.4, CH-2’’ and CH-6’’ of biPh), 7.465 (dd, 2H, J 1.8, 8.3, CH-2’ and CH-6’ of biPh), 8.212 (dd, 2H, J 1.1, 8.7, CH-2 and CH-6 of Ph), 12.237 (bs, 1H, OH); <sup>13</sup>C NMR (benzene-d<sub>6</sub>, II+ 600) 15.85 (CH<sub>3</sub>), 103.86 (C<sub>q-4</sub>), 120.08 (CH-2 and CH-6 of Ph), 126.04 (CH- 4 of Ph), 126.74 (CH-3’ and CH-5’ of biPh), 127.20 (CH-4’’ of biPh), 128.00 (CH-2’’ and CH-6’’ of biPh), 128.84 (CH-3 and CH-5 of Ph or CH-3’’ and CH-5’’ of biPh), 128.86 (CH-3 and CH-5 of Ph or CH-3’’ and CH-5’’ of biPh), 129.01 (CH-2’ and CH-6’ of biPh),

135.94 ( $C_{q-1'}$  of biPh), 138.03 ( $C_{q-1}$  of Ph), 139.92 ( $C_{q-1''}$  of biPh), 144.56 ( $C_{q-4'}$  of biPh), 147.17 ( $C_{q-3}$ ), 162.74 ( $C_{q-5}$ ), 189.99 ( $C=O$ ); COSY cross peaks: 6.972/7.138-7.221, 7.138-7.221/7.381, 7.138-7.221/8.212, 7.339/7.465; NOESY cross peaks: 1.977/7.465, 6.972/7.138-7.221, 7.138-7.221/7.381, 7.138-7.221/8.212, 7.339/7.465; HSQC cross peaks: 1.977/15.85, 6.972/126.04, 7.138-7.221/127.20, 7.138-7.221/128.84, 7.138-7.221/128.86, 7.339/126.74, 7.381/128.00, 7.465/129.01, 8.212/120.08; HMBC cross peaks: 1.977/103.86, 1.977/147.17, 6.972/120.08, 6.972/128.84 or 128.86, 6.972/138.03, 7.138-7.221/120.08, 7.138-7.221/128.00, 7.138-7.221/128.84, 7.138-7.221/128.86, 7.138-7.221/138.03, 7.138-7.221/139.92, 7.339/126.74, 7.339/135.94, 7.339/139.92, 7.381/127.20, 7.381/128.00, 7.381/144.56, 7.465/129.01, 7.465/144.56, 7.465/189.99, 8.212/120.08, 8.212/126.04, 8.212/138.03 (weak).

## References

[1] F. Manetti, M. Magnani, D. Castagnolo, L. Passalacqua, M. Botta, F. Corelli, M. Saggi, D. Deidda, A. De Logu, Ligand-based virtual screening, parallel solution-phase and microwave-assisted synthesis as tools to identify and synthesize new inhibitors of Mycobacterium tuberculosis, *ChemMedChem* 1 (2006) 973-989.

[2] B.S. Jensen, The synthesis of 1-phenyl-3-methyl-4-acyl-pyrazolones-5, *Acta Chim. Scand.* 13 (1959) 1668-1670.

### 1.1. NMR spectra of HL:

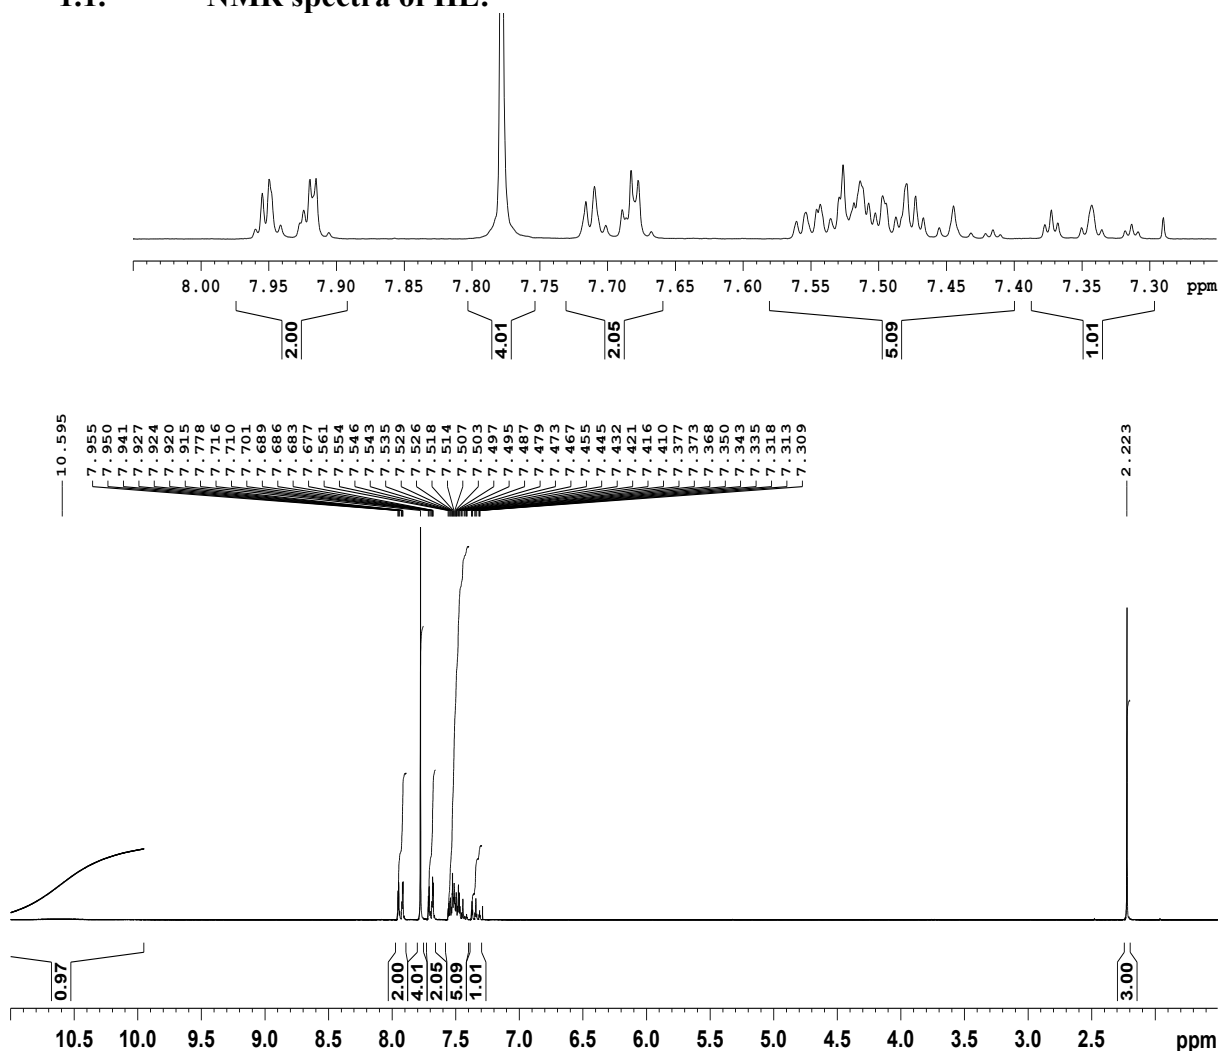

**Figure S1.**  $^1\text{H}$  NMR spectrum of 3-methyl-1-phenyl-4-(4-phenylbenzoyl)-pyrazol-5-one in  $\text{CDCl}_3$ .

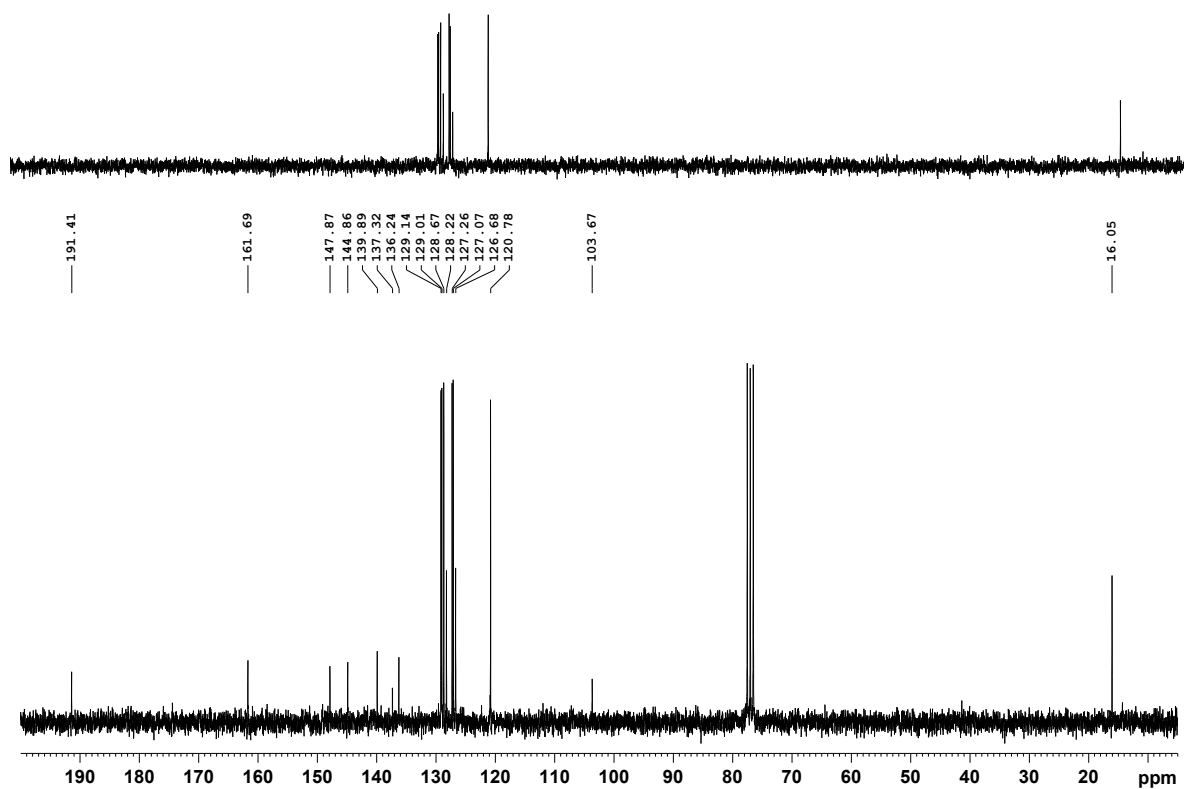

**Figure S2.**  $^{13}\text{C}$  (down) and DEPT (up) NMR spectra of 3-methyl-1-phenyl-4-(4-phenylbenzoyl)-pyrazol-5-one in  $\text{CDCl}_3$ .

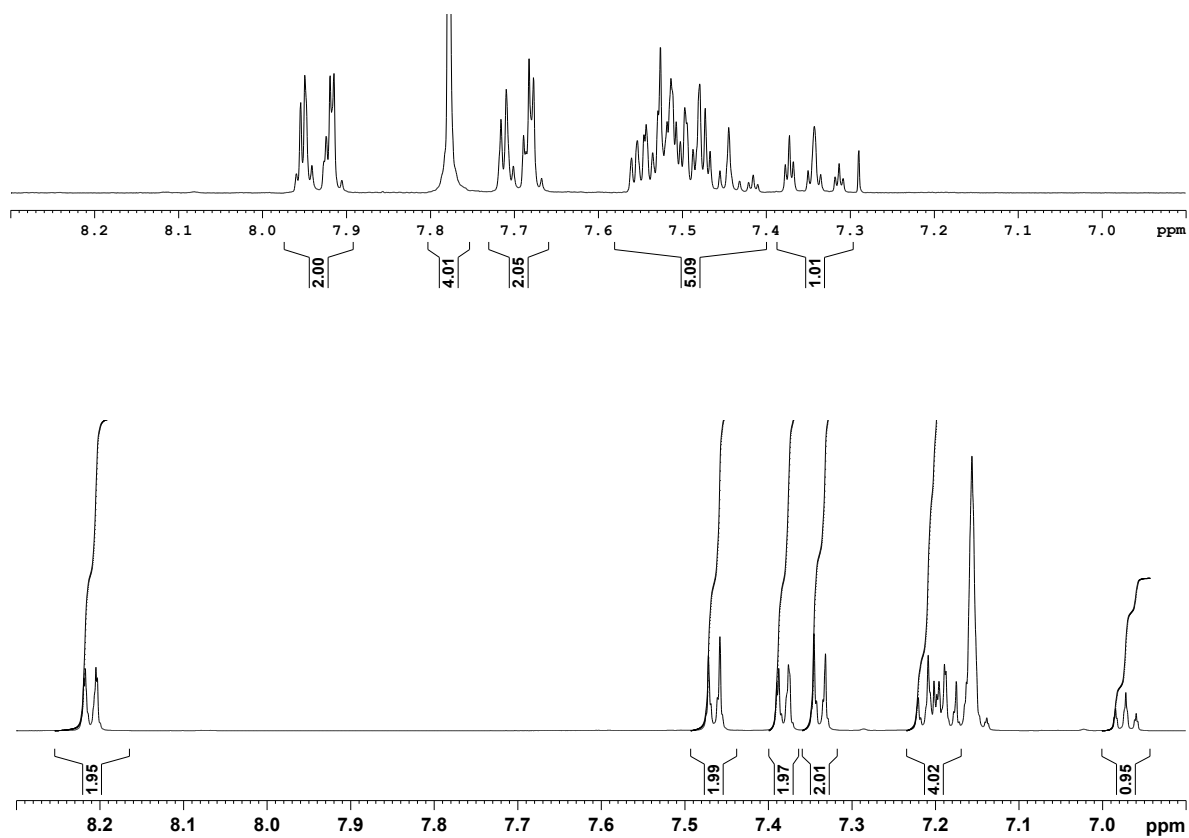

**Figure S3.**  $^1\text{H}$  NMR spectrum of 3-methyl-1-phenyl-4-(4-phenylbenzoyl)-pyrazol-5-one in  $\text{CDCl}_3$  (up) and in benzene- $\text{d}_6$  (down).

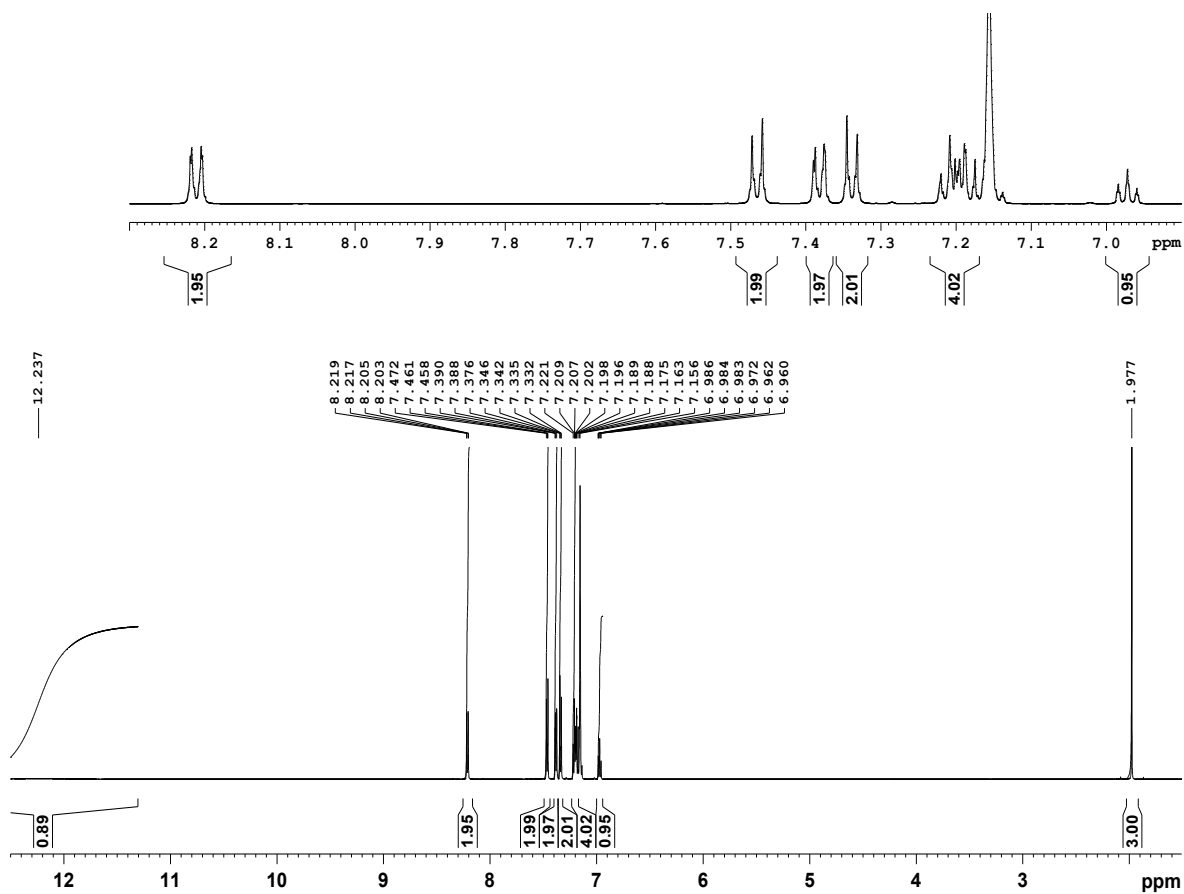

**Figure S4.**  $^1\text{H}$  NMR spectrum of 3-methyl-1-phenyl-4-(4-phenylbenzoyl)-pyrazol-5-one in benzene- $\text{d}_6$ .

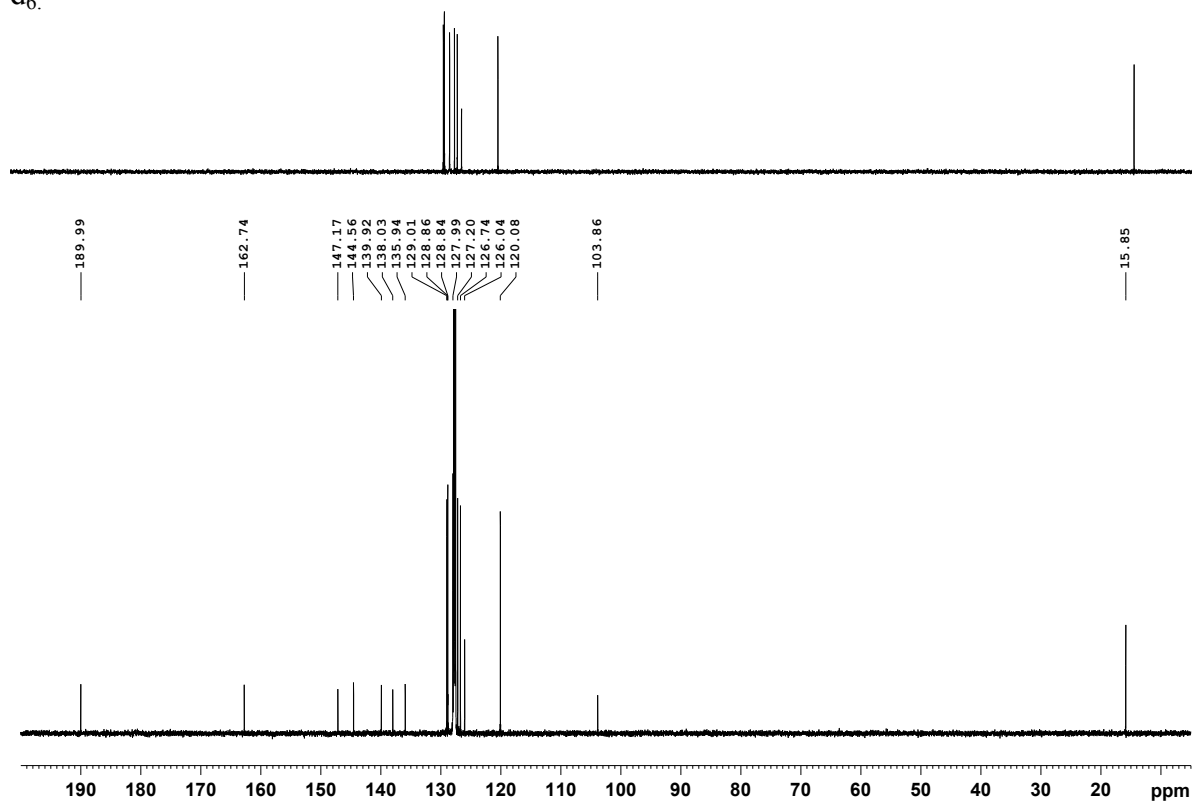

**Figure S5.**  $^{13}\text{C}$  (down) and DEPT (up) NMR spectra of 3-methyl-1-phenyl-4-(4-phenylbenzoyl)-pyrazol-5-one in benzene- $\text{d}_6$ .

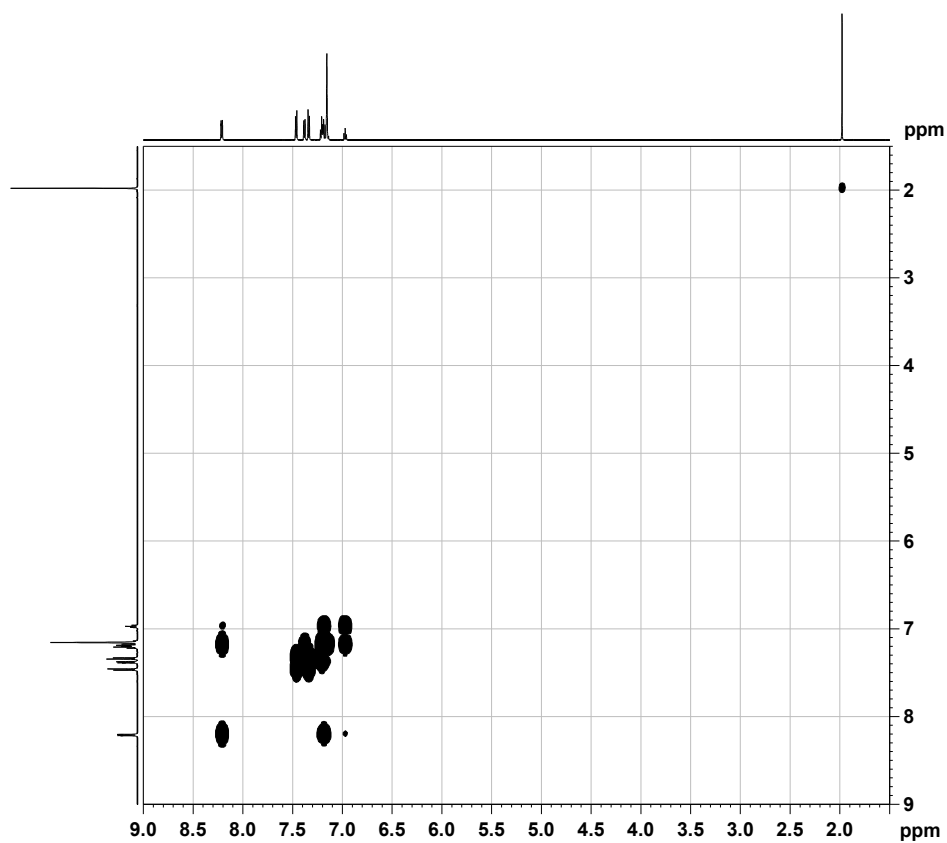

**Figure S6.** <sup>1</sup>H-<sup>1</sup>H COSY NMR spectrum of 3-methyl-1-phenyl-4-(4-phenylbenzoyl)-pyrazol-5-one in benzene-d<sub>6</sub>.

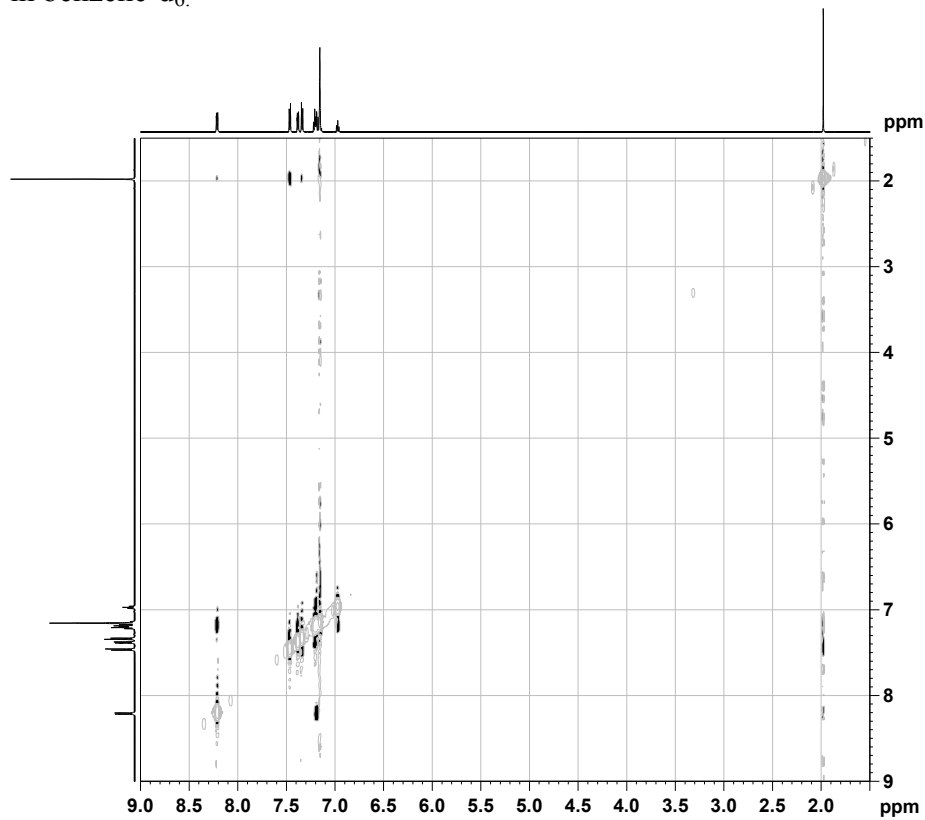

**Figure S7.** <sup>1</sup>H-<sup>1</sup>H NOESY NMR spectrum of 3-methyl-1-phenyl-4-(4-phenylbenzoyl)-pyrazol-5-one in benzene-d<sub>6</sub>.

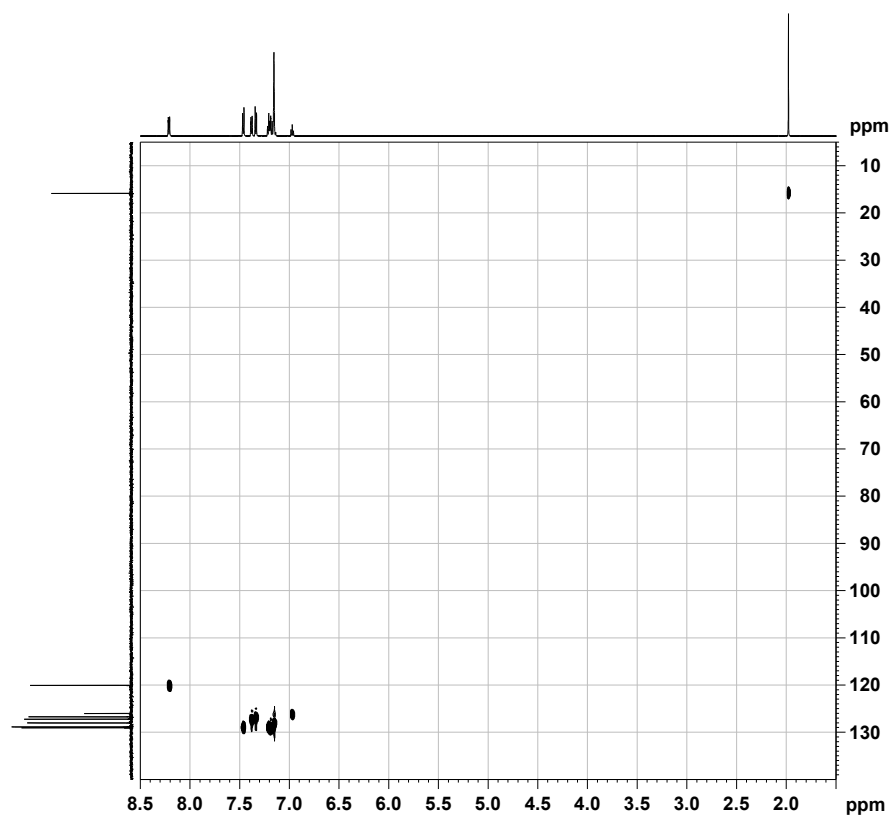

**Figure S8.**  $^1\text{H}$ - $^{13}\text{C}$  HSQC NMR spectrum of 3-methyl-1-phenyl-4-(4-phenylbenzoyl)-pyrazol-5-one in benzene- $\text{d}_6$ .

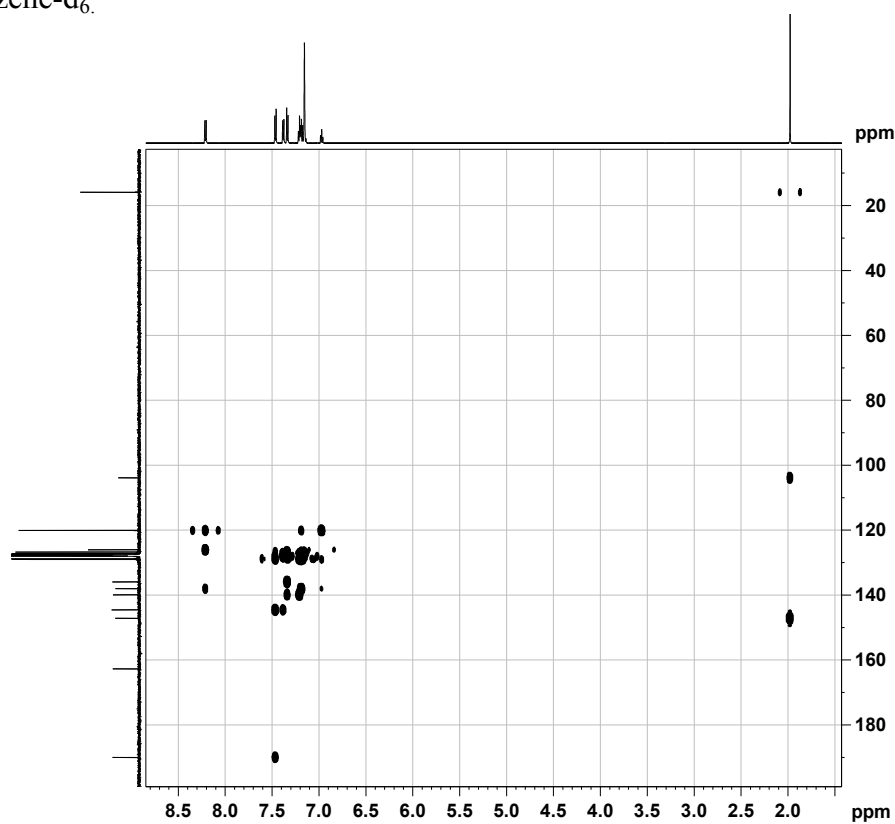

**Figure S9.**  $^1\text{H}$ - $^{13}\text{C}$  HMBC NMR spectrum of 3-methyl-1-phenyl-4-(4-phenylbenzoyl)-pyrazol-5-one in benzene- $\text{d}_6$ .

## 2. NMR characterization of $S_{IV}$

The quality of 5,11,17,23-tetra-*tert*-butyl-25,26,27,28-tetrakis-(dimethylphosphinoylmethoxy)calix[4]arene ( $S_{IV}$ ) has been checked by  $^1H$  NMR in  $CDCl_3$  (250 MHz, 25°C):  $\delta = 1.074$ (s, 36H,  $(CH_3)_3C$ ), 1.532(d,  $^2J_{HP}=12.9$  Hz, 24H,  $(CH_3)_2P=O$ ), 3.268(d,  $^2J_{HH}=13.0$  Hz, 4H, Ar- $CH_2$ -Ar), 4.688(d,  $^2J_{HP}=1.3$  Hz, 8H,  $CH_2P=O$ ), 4.836(d,  $^2J_{HH}=13.0$  Hz, 4H, Ar- $CH_2$ -Ar), 6.800(s, 8H, Ar- $H$ ) and in  $CD_3OD$  (250MHz, 25°C):  $\delta = 1.001$ (s, 36H,  $(CH_3)_3C$ ), 1.527(d,  $^2J_{HP}=13.1$  Hz, 24H,  $(CH_3)_2P=O$ ), 3.292(d,  $^2J_{HH}=13.2$  Hz, 4H, Ar- $CH_2$ -Ar), 4.668(d,  $^2J_{HP}=1.3$  Hz, 8H,  $CH_2P=O$ ), 4.780(d,  $^2J_{HH}=13.2$  Hz, 4H, Ar- $CH_2$ -Ar), 6.891(s, 8H, Ar- $H$ ).

## 3. Solvent extraction of $Ln^{3+}$ ions with HL alone using $CHCl_3$ as diluent.

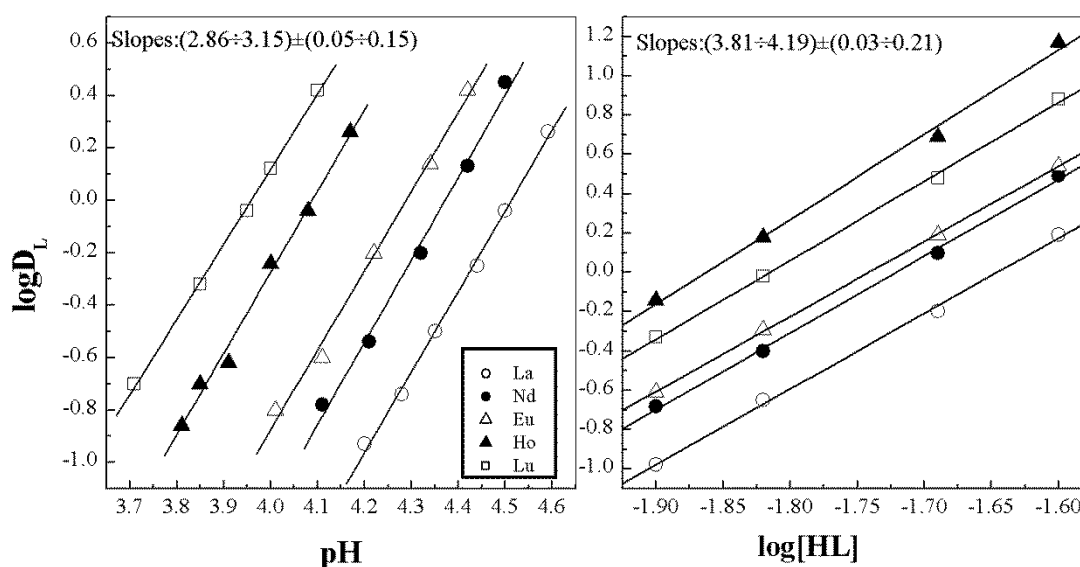

**Figure S10.**  $\log D_L$  vs. pH for the extraction of lanthanoid(III) ions with HL alone at  $[HL] = 1.5 \times 10^{-2} \text{ mol/dm}^3$  in  $CHCl_3$ .

$\log D_L$  vs.  $[HL]$  for the extraction of lanthanoid(III) ions with HL alone in  $CHCl_3$ : La, pH=4.30; Nd, pH=4.25; Eu, pH=4.25; Ho, pH=4.15; Lu, pH=3.95.

**Table S1:** Ratio and linear correlation coefficient (in parenthesis) between experimental and fitted D values.

| Ln | $CHCl_3$      |                  | IL               |                  |
|----|---------------|------------------|------------------|------------------|
|    | HL alone      | HL + $S_{IV}$    | HL alone         | HL + $S_{IV}$    |
| La | 1.02 (0.979)  | 0.968<br>(0.989) | 0.983<br>(0.974) | 0.985<br>(0.996) |
| Nd | 0.972 (0.986) | 1.00<br>(0.993)  | nd               | nd               |
| Eu | 1.00 (0.973)  | 1.02<br>(0.986)  | nd               | nd               |
| Ho | 0.968 (0.989) | 0.984<br>(0.945) | nd               | nd               |
| Lu | 0.990 (0.989) | 0.984<br>(0.958) | nd               | nd               |

nd: not determined.

#### 4. Interaction between HL and S<sub>IV</sub>

All samples were prepared separately by using pure dry compounds dissolved in deuteriochloroform (Deutero GmbH). The spectra of the individual ligand (HL) and the synergist S<sub>IV</sub>, assigned as S in figures captions for simplicity, were recorded in 0.05 M concentrations. The spectra of the 2:1 and 1:1 S:HL mixtures were recorded as 0.05 M calixarene and 0.025 M and 0.05 M pyrazolone, respectively.

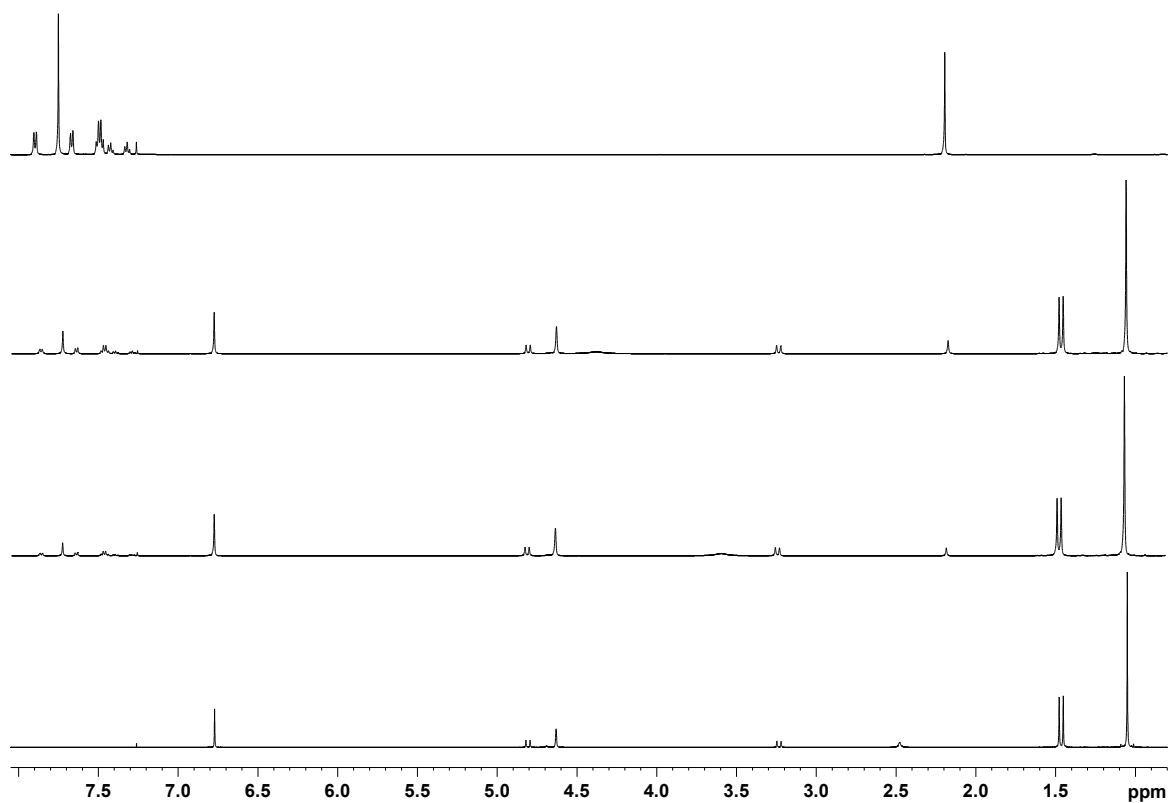

**Figure S11.** <sup>1</sup>H spectra of (from bottom to top): S, S:HL 2:1, S:HL 1:1 and HL in CDCl<sub>3</sub>.



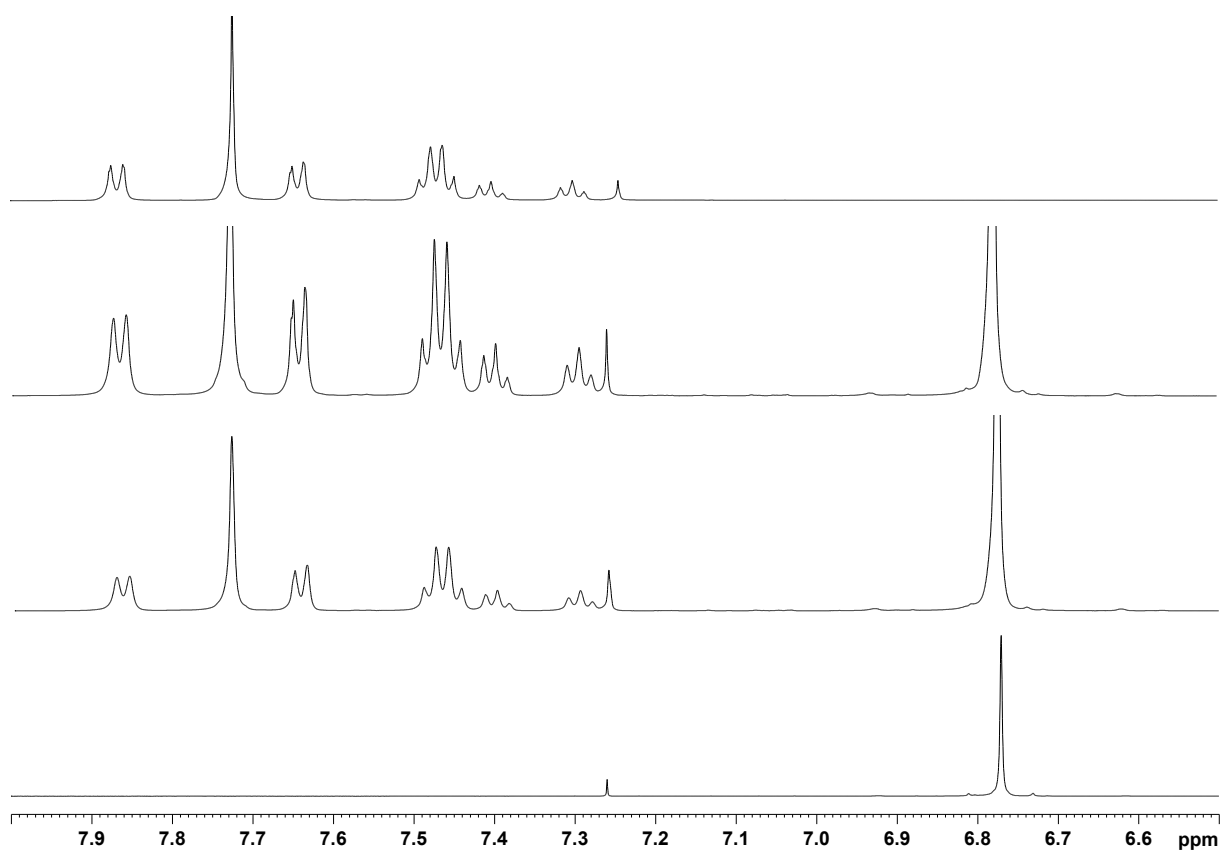

**Figure S12.** The aromatic area of  $^1\text{H}$  spectra of (from bottom to top): S, S:HL 2:1, S:HL 1:1 and HL in  $\text{CDCl}_3$ .

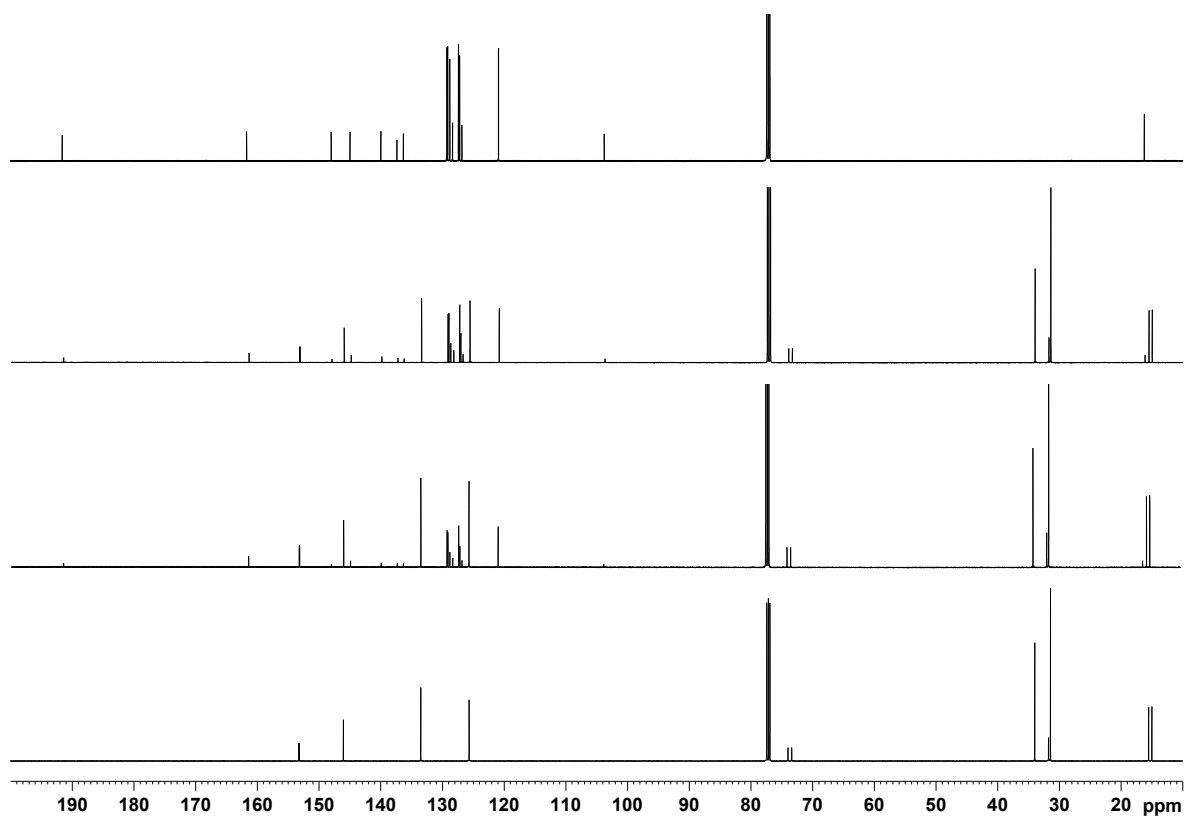

**Figure S13.**  $^{13}\text{C}$  spectra of (from bottom to top): S, S:HL 2:1, S:HL 1:1 and HL in  $\text{CDCl}_3$ .

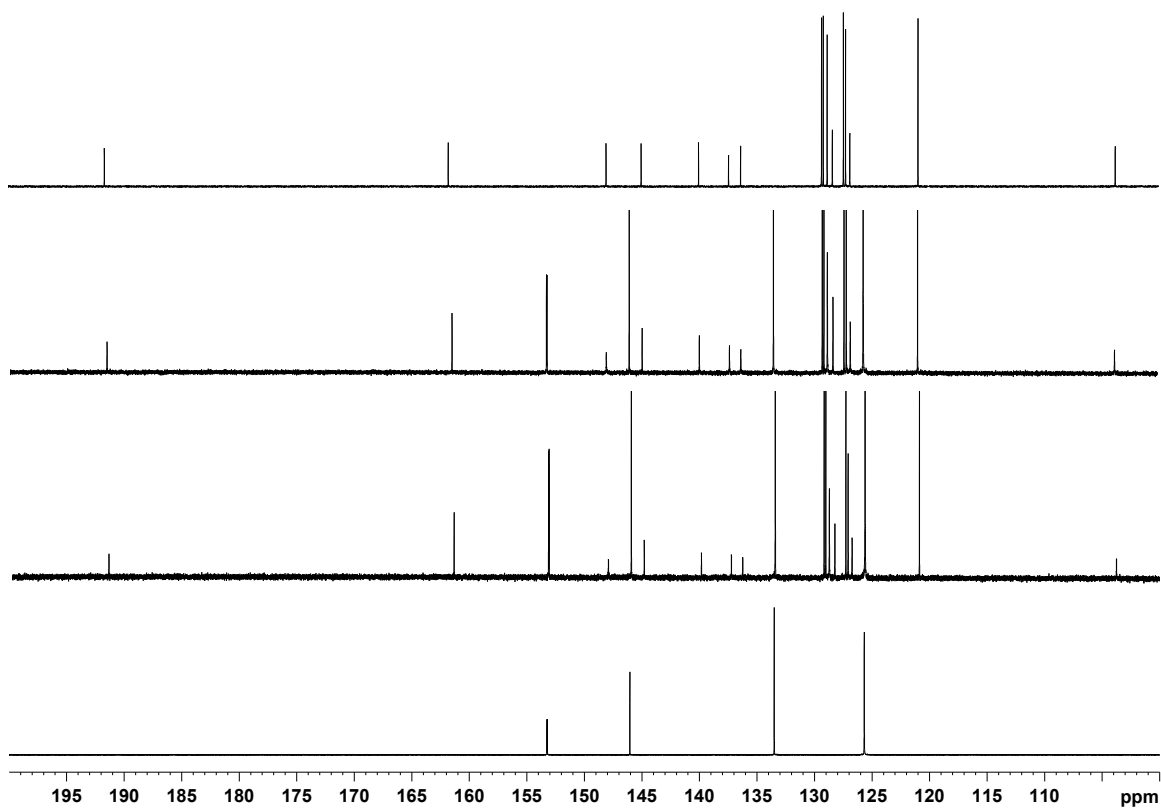

**Figure S14.** The aromatic area of  $^{13}\text{C}$  spectra of (from bottom to top): S, S:HL 2:1, S:HL 1:1 and HL in  $\text{CDCl}_3$ .

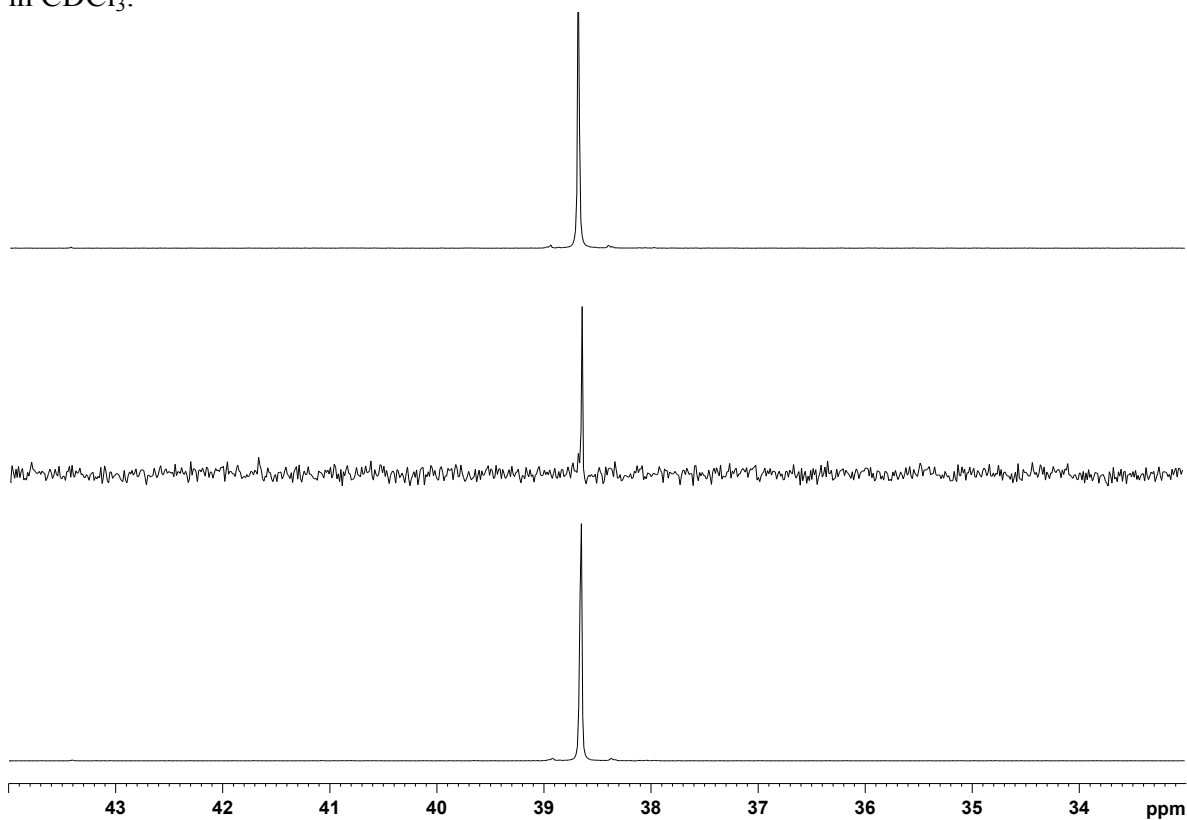

**Figure S15.**  $^{31}\text{P}$  spectra of S (bottom), S:HL 2:1 (middle) and S:HL 1:1 (top) in  $\text{CDCl}_3$ .

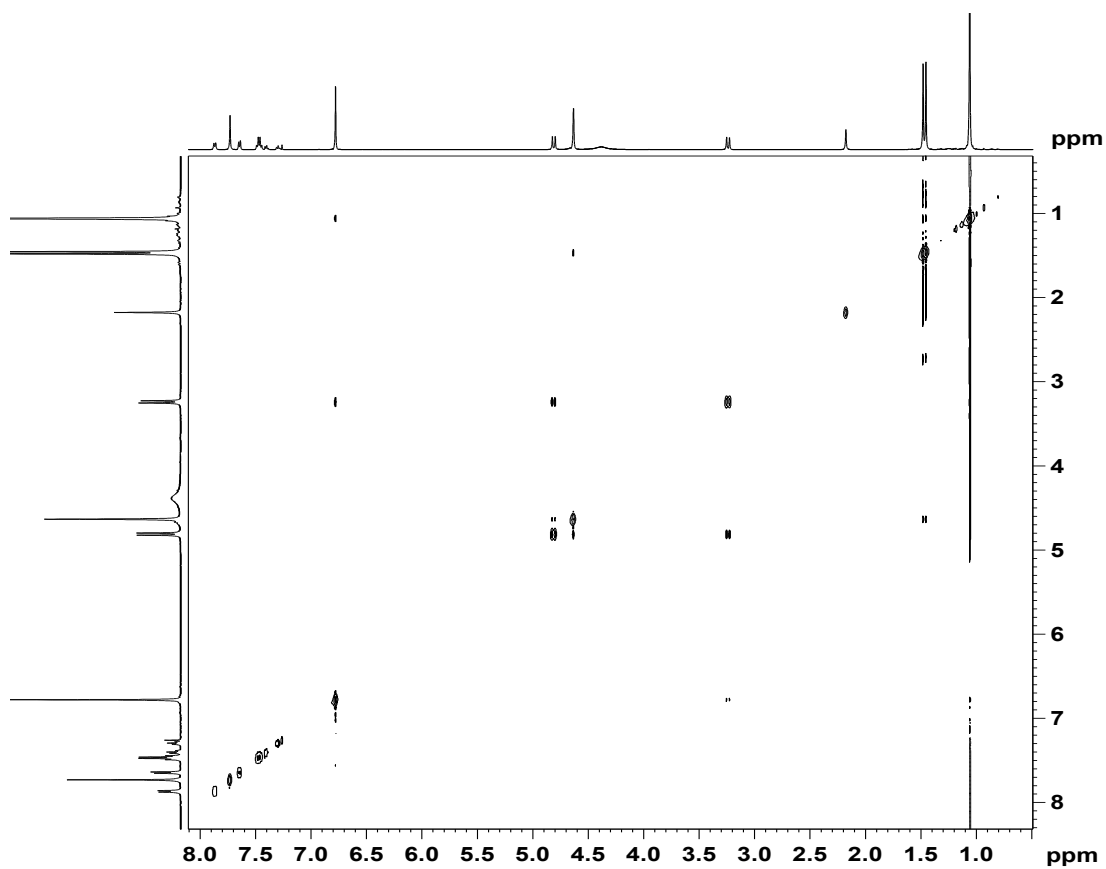

**Figure S16.**  $^1\text{H}$ - $^1\text{H}$  ROESY spectrum of S:HL 2:1 mixture in  $\text{CDCl}_3$ .

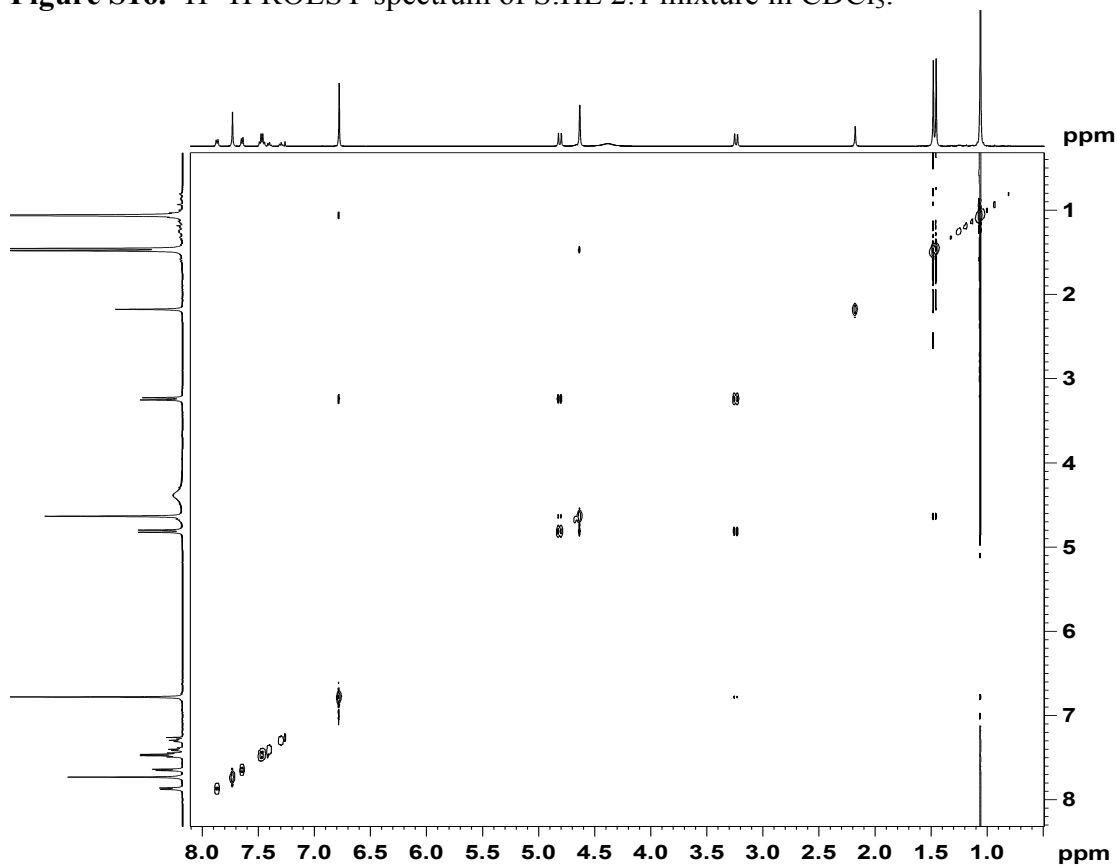

**Figure S17.**  $^1\text{H}$ - $^1\text{H}$  ROESY spectrum of S:HL 1:1 mixture in  $\text{CDCl}_3$ .

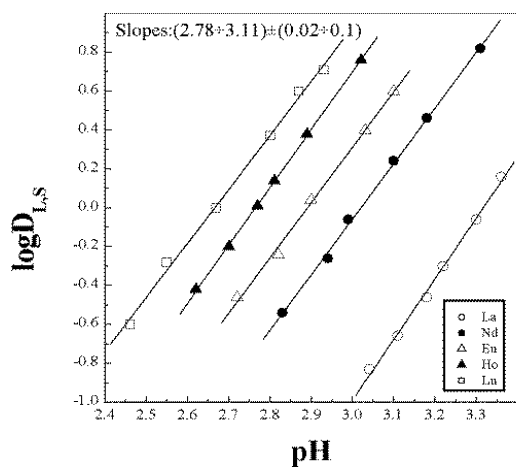

**Figure S18.**  $\log D_{L,S}$  vs. pH for the extraction of lanthanoid(III) ions with mixtures HL-S<sub>IV</sub> at  $[\text{HL}] = 1.5 \times 10^{-2} \text{ mol/dm}^3$  and  $[\text{S}_{IV}] = 6 \times 10^{-4} \text{ mol/dm}^3$  in  $\text{CHCl}_3$ .

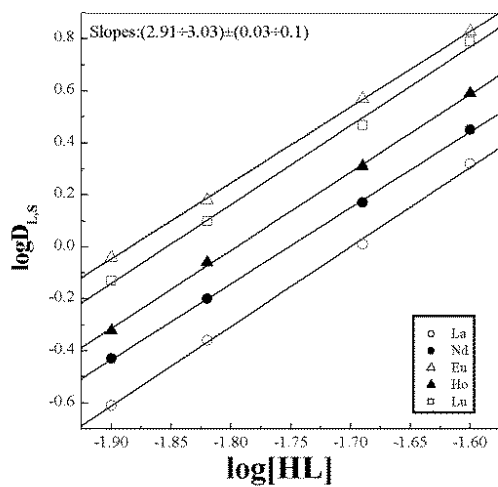

**Figure S19.**  $\log D_{L,S}$  vs.  $\log[\text{HL}]$  for the extraction of lanthanoid(III) ions with mixtures HL-S<sub>IV</sub> at  $[\text{S}_{IV}] = 6 \times 10^{-4} \text{ mol/dm}^3$  in  $\text{CHCl}_3$  : La, pH=3.20; Nd, pH=2.95; Eu, pH=2.95; Ho, pH=2.75; Lu, pH=2.70.

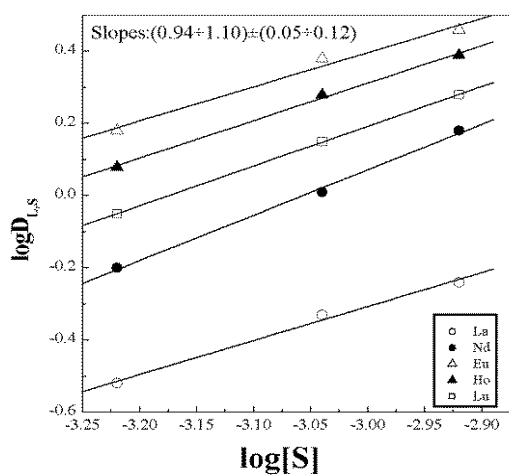

**Figure S20.**  $\text{Log}D_{L,S}$  vs.  $\text{log}[S_{IV}]$  for the extraction of lanthanoid(III) ions with mixtures HL– $S_{IV}$  at  $[\text{HL}] = 1.5 \times 10^{-2} \text{ mol/dm}^3$  in  $\text{CHCl}_3$ : La,  $\text{pH}=3.15$ ; Nd,  $\text{pH}=2.95$ ; Eu,  $\text{pH}=2.95$ ; Ho,  $\text{pH}=2.80$ ; Lu,  $\text{pH}=2.65$ .

### 5. Solvent extraction of $\text{La}^{3+}$ ion with HL and $S_{IV}$ used alone and IL as diluent.

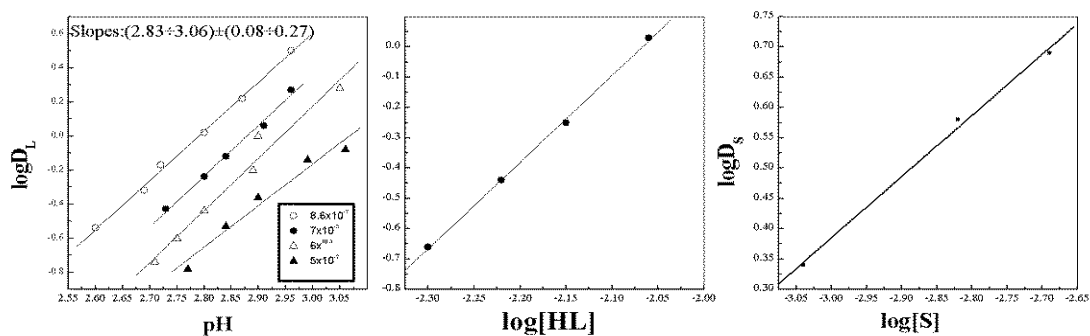

**Figure S21.**  $\text{Log}D_L$  vs.  $\text{pH}$  for the extraction of lanthanum(III) ions with HL alone in IL.  $\text{Log}D_L$  vs.  $[\text{HL}]$  for the extraction of lanthanum(III) ions with HL alone in IL at  $\text{pH}=2.80$ .  $\text{Log}D_L$  vs.  $[\text{S}]$  for the extraction of lanthanum(III) ions with S alone in IL at  $\text{pH}=3.05$ .

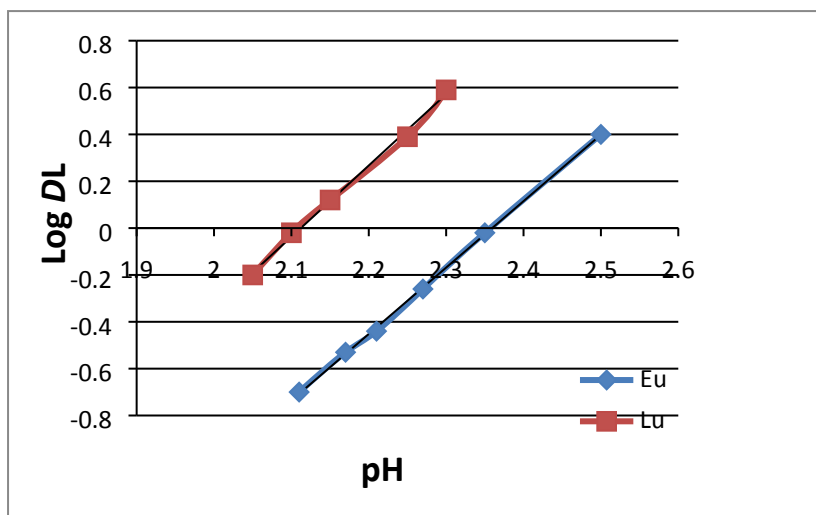

**Figure S22.**  $\text{Log}D_L$  vs. pH for the extraction of Ln(III) ions with  $[\text{HL}]=7 \times 10^{-3} \text{ mol/dm}^3$  alone in IL.

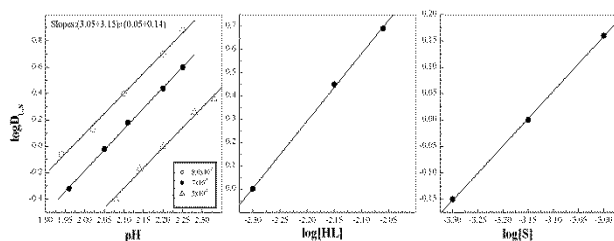

**Fig. 23.**  $\text{Log}D_{L,S}$  vs. pH for La(III) extraction with mixture HL-S<sub>IV</sub> at  $[\text{S}_{IV}]=7 \times 10^{-4} \text{ mol/dm}^3$  in IL.  
 $\text{Log}D_{L,S}$  vs.  $\log[\text{HL}]$  for La(III) ions extraction with mixture HL-S<sub>IV</sub> at  $[\text{S}_{IV}]=7 \times 10^{-4} \text{ mol/dm}^3$  and pH=2.20.  
 $\text{Log}D_{L,S}$  vs.  $\log[\text{S}_{IV}]$  for La(III) ions extraction with mixture HL-S<sub>IV</sub> at  $[\text{HL}]=5 \times 10^{-3} \text{ mol/dm}^3$  and pH=2.20.

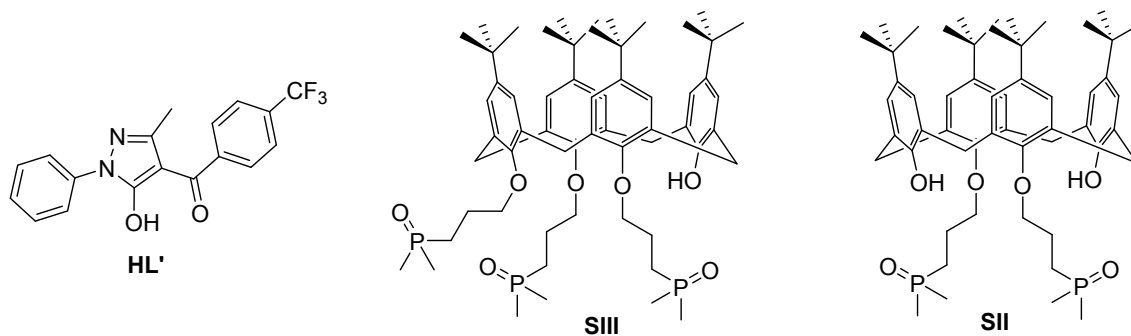

**Figure S24.** Chemical structures of 3-methyl-1-phenyl-4-(4-trifluoromethylbenzoyl)-pyrazol-5-one, HL' and partially substituted calix[4]arenes by phosphinoyl functions.
